# Supplementary material for: Deep learning model to diagnose cardiac amyloidosis from haematoxylin/eosin-stained myocardial tissue
Source: PubMed Central journal article supplement — Eur Heart J Imaging Methods Pract. 2024 Dec 30;3(1):qyae141. doi: 10.1093/ehjimp/qyae141 (PMC11728699; doi:10.1093/ehjimp/qyae141), 2024-12-30
Supplement: qyae141_supplementary_data.pdf [file qyae141_supplementary_data.pdf]

## **Supplementary material**

### **Deep Learning Model to Diagnose Cardiac Amyloidosis from Hematoxylin/Eosin-Stained Myocardial Tissue**

Takeshi Tohyama, Takeshi Iwasaki, Masataka Ikeda\*, Masato Katsuki, Tatsuya Watanabe,  
Kayo Misumi, Keisuke Shinohara, Takeo Fujino, Toru Hashimoto, Shouji Matsushima,  
Tomomi Ide, Junji Kishimoto, Koji Todaka, Yoshinao Oda, and Kohtaro Abe

\*To whom correspondence should be addressed: Masataka Ikeda

Department of Cardiovascular Medicine, Faculty of Medical Sciences, Kyushu University,  
Fukuoka, Japan

3-1-1 Maidashi, Higashi-ku, Fukuoka 812-8582, Japan

Phone: +81-92-642-5360, Fax: +81-92-642-5374

Email: [ikeda-m@cardiol.med.kyushu-u.ac.jp](mailto:ikeda-m@cardiol.med.kyushu-u.ac.jp)

## Figure S1

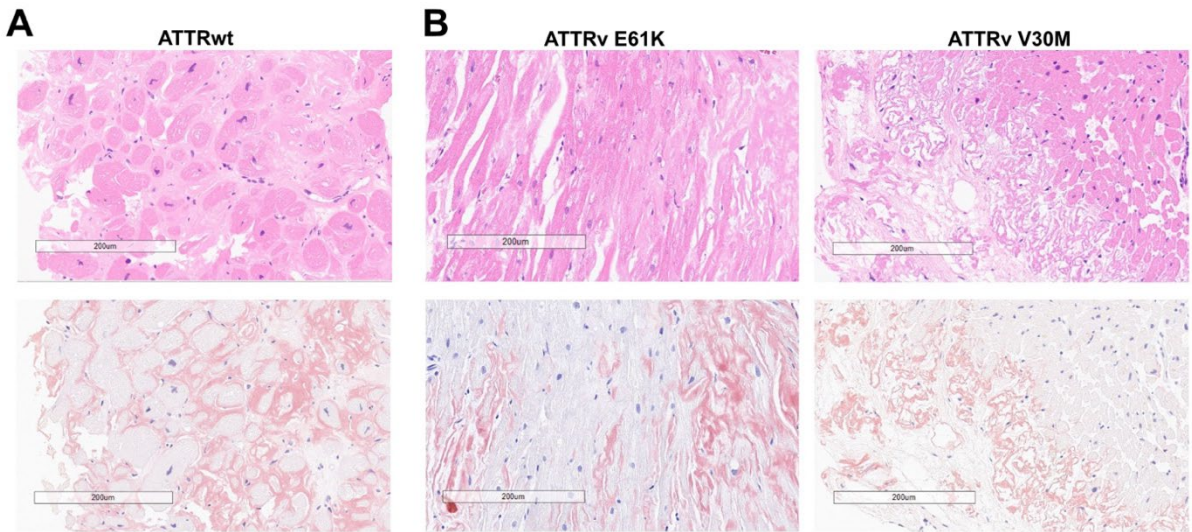

**Figure S1** Images of hematoxylin/eosin (HE; upper panel) and Dylon (lower panel) staining in cases with wild-type transthyretin amyloidosis (ATTRwt) and variant transthyretin amyloidosis (ATTRv). (A) Images of HE and Dylon staining in cases with ATTRwt. (B) Images of HE and Dylon staining in cases with ATTRv, including the Lys61Glu (E61K) and Val30Met (V30M) variants.

## Figure S2

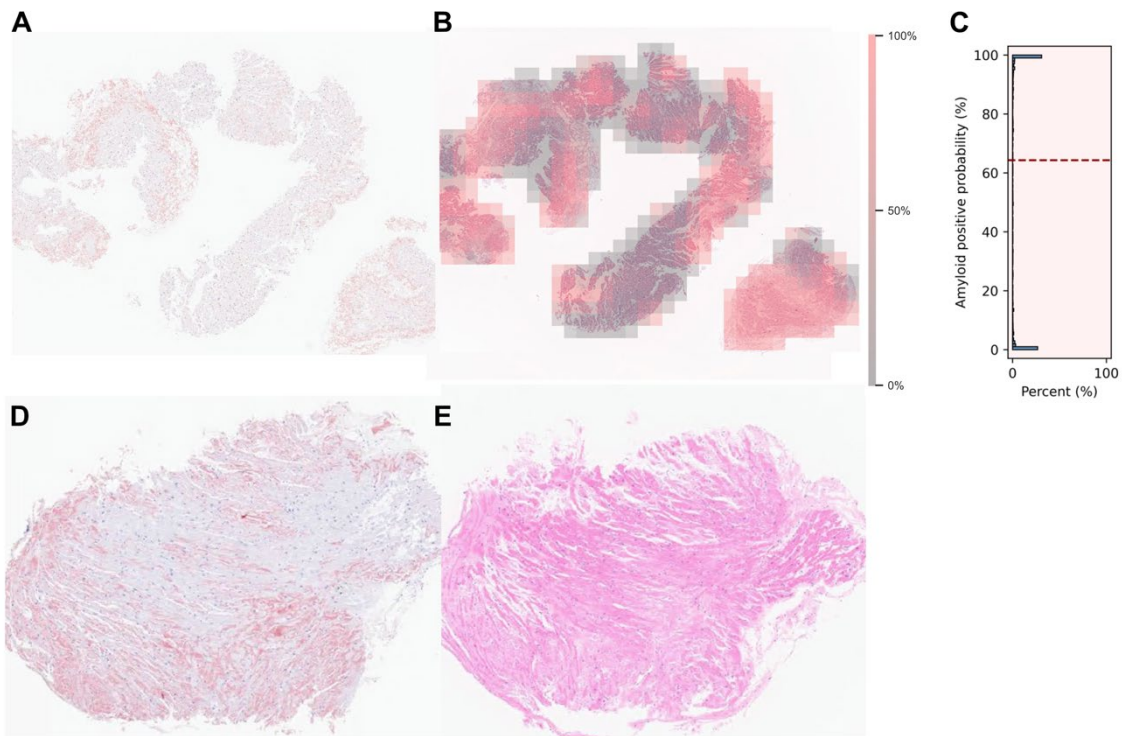

**Figure S2** Sets of Dylon staining (*A* and *D*), HE staining overlaid with the amyloid-positive area predicted by the model (*B*) and without overlay (*E*), and the distributions of amyloid-positive probabilities on a specimen basis (*C*). The set of *A*, *B*, and *C* is a case of variant transthyretin amyloidosis (ATTRv) with Val30Met (V30M), which was assigned to the test set for model development. The set of *C* and *D* is a case of ATTRv with Lys61Glu (E61K), which was assigned to the set for model evaluation; therefore, the Dylon (*D*) and HE staining images without overlay (*E*) are provided for reference. The distribution is described by histograms, and the median probability is indicated by a red-dotted line.

**Table S1**

| Case | Year of Dx | Age | Sex | Type   | Indication of Bx                                      | LVH | LVEF |
|------|------------|-----|-----|--------|-------------------------------------------------------|-----|------|
| 1    | 2014       | 76  | F   | AL     | Heart failure<br>Myocarditis susp.<br>(post-recovery) | +   | 61   |
| 2    | 2016       | 82  | M   | ATTRwt | LV dysfunction                                        | +   | 36   |
| 3    | 2017       | 74  | M   | ATTRwt | LV dysfunction<br>CS susp.                            | +   | 36   |
| 4    | 2017       | 82  | M   | ATTRwt | Asynergy<br>AS                                        | +   | 79   |
| 5    | 2018       | 88  | F   | ATTRwt | Asynergy<br>AS                                        | +   | 59   |
| 6    | 2019       | 89  | M   | ATTRwt | LV dysfunction<br>MR                                  | –   | 49   |
| 7    | 2019       | 81  | F   | ATTRwt | LV dysfunction<br>Heart failure                       | –   | 41   |
| 8    | 2020       | 91  | M   | ATTRwt | LV dysfunction<br>Heart failure                       | –   | 39   |
| 9    | 2020       | 71  | M   | ATTRwt | LV dysfunction<br>CS susp.                            | +   | 41   |

**Table S1** Clinical information of 9 cases who had no suspicion of amyloidosis prior to biopsy.

Left ventricular hypertrophy (LVH) was defined as an average thickness of the interventricular septum (IVS) and left posterior ventricular wall (LVPW) of  $\geq 11$  mm or greater, or a left ventricular mass of  $\geq 115$  g/m<sup>2</sup> in men and  $\geq 95$  g/ m<sup>2</sup> in women. Dx, diagnosis; Bx, biopsy; LVEF, left ventricular ejection fraction; F, female; M, male; CS, cardiac sarcoidosis; AS, aortic stenosis; MR, mitral regurgitation.
